# Supplementary material
Source: PubMed Central journal article supplement (PMC5750517)
Supplement: jnm178335SupplementaryData.pdf [file jnm178335SupplementaryData.pdf]

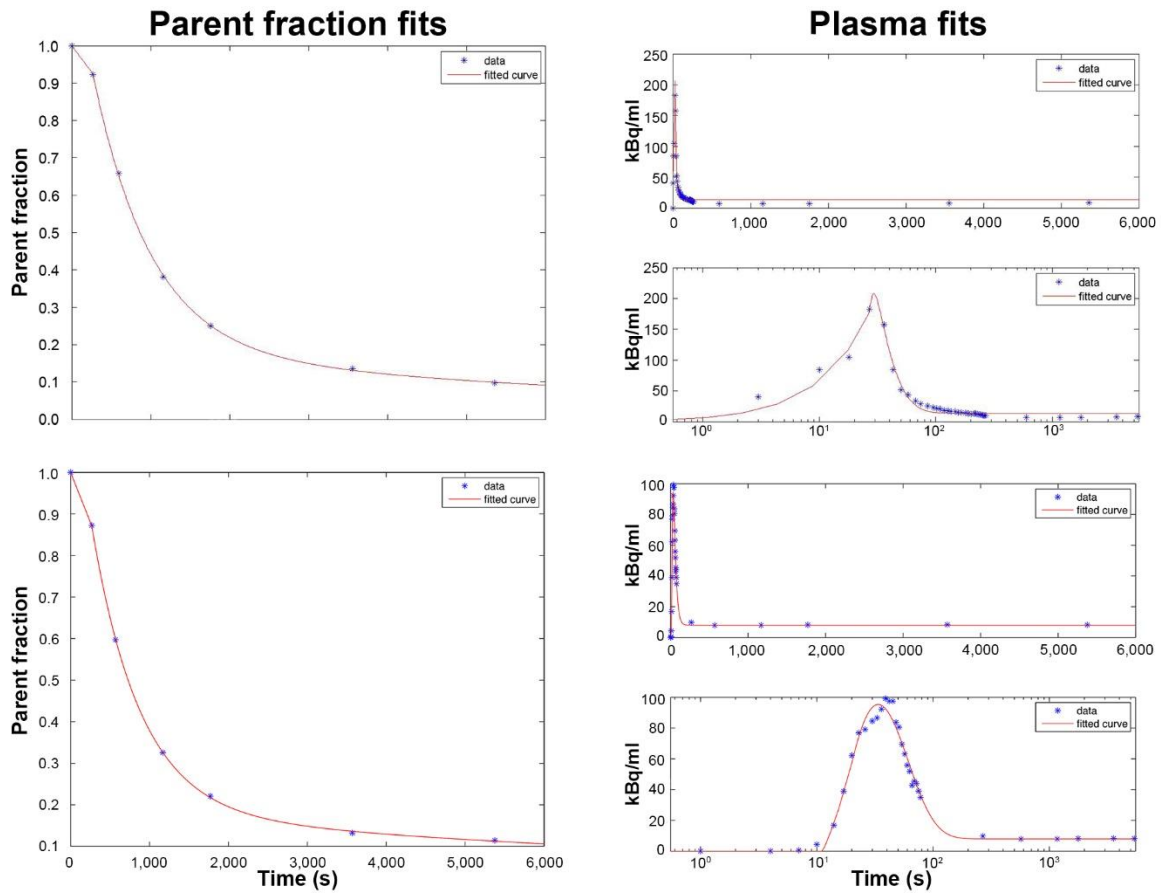

**SUPPLEMENTAL FIGURE 1.** Examples of model fitting for parent fraction and plasma activity for two representative subjects. Actual datapoints are shown as blue stars, exponential model fit of the data is shown as a red line. Left: parent fraction fits for a control subject (top) and patient (bottom). Right: plasma activity fits for a control subject (top) and patient (bottom). The bottom subpanel is on a logarithmic scale to show fitting of the peak.

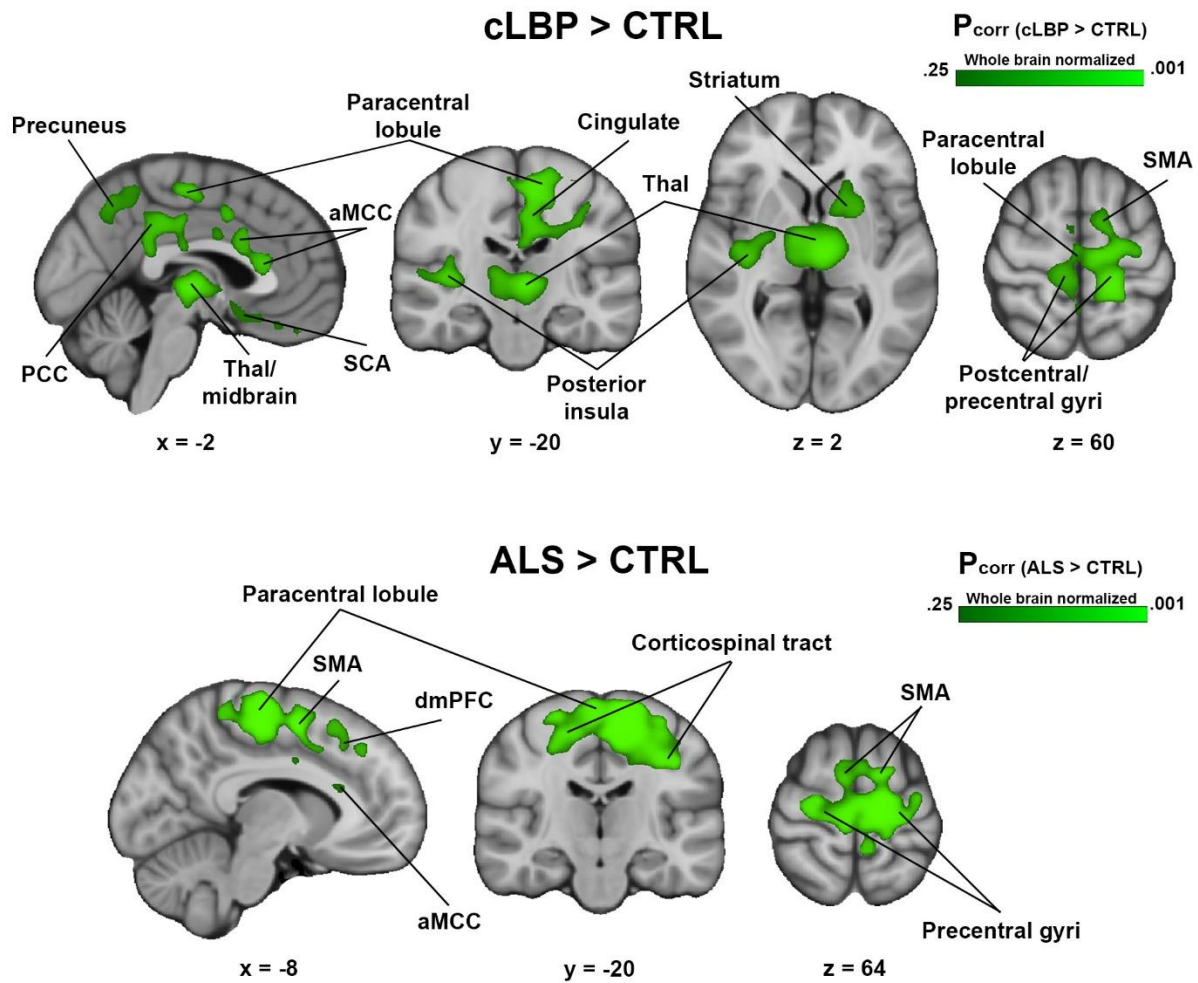

**SUPPLEMENTAL FIGURE 2.** Regions of elevated  $^{11}\text{C}$ -PBR28  $\text{SUVR}_{\text{WB}}$  in patients compared to controls, visualized at an extremely lenient statistical threshold ( $p < 0.25$ ). These results show group differences highly overlapping with those observed at strict threshold with the  $\text{SUVR}_{\text{occip}}$  analyses (Fig. 5). Top: cLBP > controls. Bottom: ALS > controls. No region was significant in either the cLBP < controls or ALS < controls contrasts.

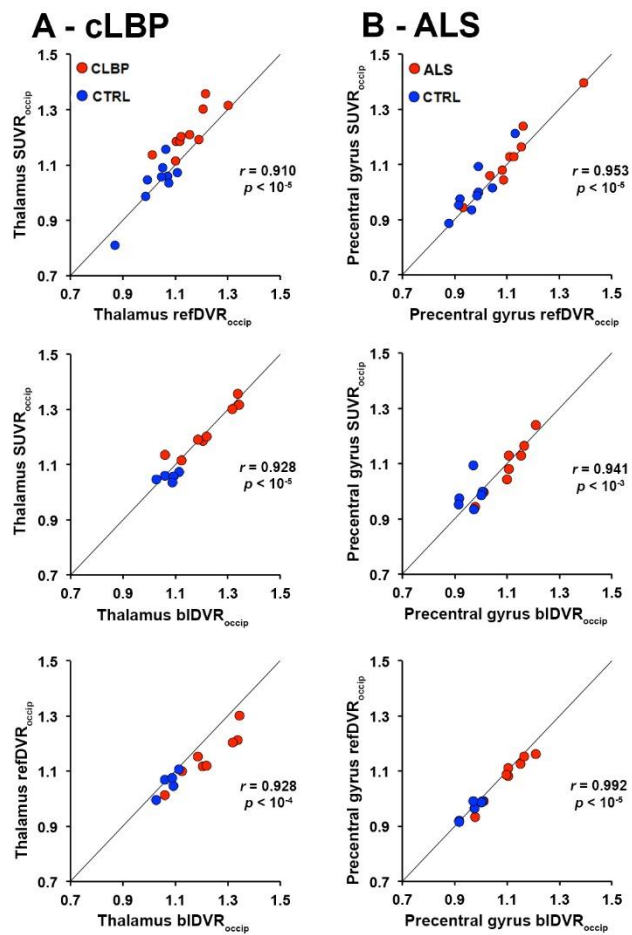

**SUPPLEMENTAL FIGURE 3.** Relationship between target SUVR<sub>occip</sub>, refDVR<sub>occip</sub>, and bDVR<sub>occip</sub>. Line of identity is shown in black.

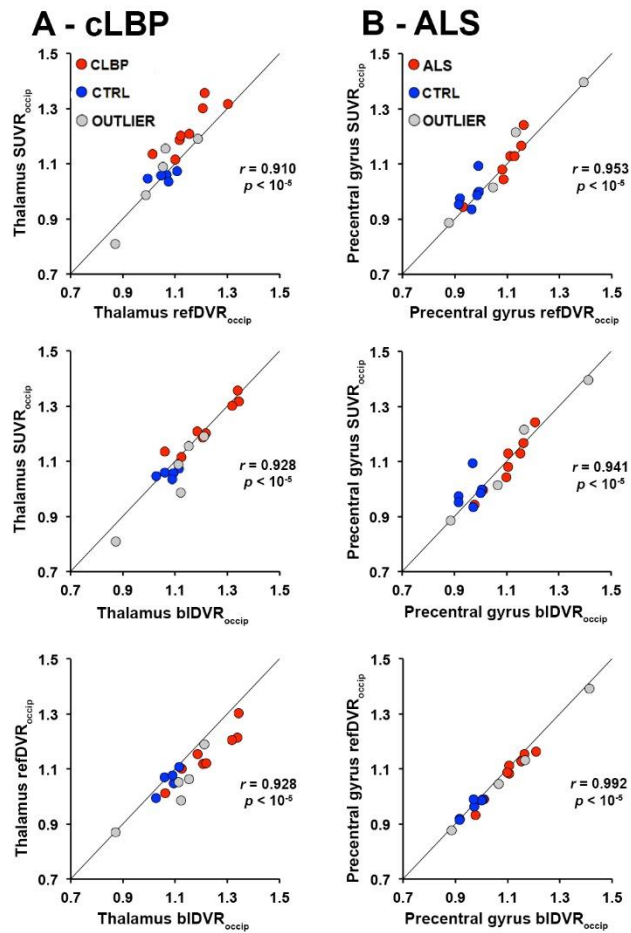

**SUPPLEMENTAL FIGURE 4.** Relationship between target SUVR<sub>occip</sub>, refDVR<sub>occip</sub>, and bDVR<sub>occip</sub>, plasma outliers included and identified. Line of identity is shown in black.

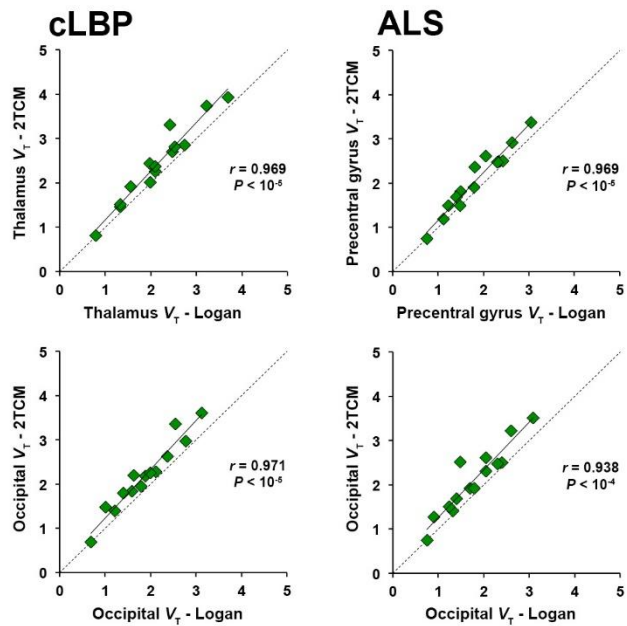

**SUPPLEMENTAL FIGURE 5.** Relationship between Logan and 2TCM estimations of target and occipital cortex  $V_t$ . Line of identity is shown as a dotted diagonal line. Plasma outliers are not included.

**SUPPLEMENTAL TABLE 1.** Subject demographics

|                            | cLBP                    | CON (cLBP)              | ALS                     | CON (ALS)               |
|----------------------------|-------------------------|-------------------------|-------------------------|-------------------------|
| N                          | 10                      | 9                       | 10                      | 10                      |
| Sex                        | 5M/5F                   | 5M/4F                   | 6M/4F                   | 6M/4F                   |
| <i>TSPO</i><br>Genotype    | 7 Ala/Ala;<br>3 Ala/Thr | 7 Ala/Ala;<br>2 Ala/Thr | 6 Ala/Ala;<br>4 Ala/Thr | 6 Ala/Ala;<br>4 Ala/Thr |
| Age (years)                | 48.9 (12)               | 49.6 (12)               | 53.2 (11)               | 51.1 (11)               |
| Injected Dose<br>(MBq)     | 409.5 (27.9)            | 407.4 (15.4)            | 429.7 (33.8)            | 424.5 (42)              |
| Injected mass<br>(nmol/kg) | 0.06 (0.02)             | 0.10 (0.07)             | 0.06 (0.02)             | 0.11 (0.07)             |

Values shown are mean  $\pm$  standard deviation.

**SUPPLEMENTAL TABLE 2.** Regions of voxelwise increases in [<sup>11</sup>C]PBR28 SUVR<sub>occip</sub> in cLBP patients compared to controls.

| Region                          | P-value<br>(corr) | MNI coordinates (mm) |     |     | Cluster size (# voxels) |
|---------------------------------|-------------------|----------------------|-----|-----|-------------------------|
|                                 |                   | X                    | Y   | Z   |                         |
| L Thalamus                      | 0.006             | -4                   | -18 | 0   | 1871                    |
| R Thalamus                      | 0.016             | 2                    | -18 | 0   |                         |
| L Putamen                       | 0.021             | -22                  | 6   | 2   |                         |
| L Caudate                       | 0.029             | -14                  | 14  | 6   |                         |
| L Subcallosal area              | 0.033             | -4                   | 14  | -16 |                         |
| L Ventral striatum              | 0.035             | -6                   | 8   | -6  |                         |
| L Paracentral lobule            | 0.008             | -8                   | -22 | 50  | 7236                    |
| L Postcentral gyrus             | 0.008             | -18                  | -38 | 64  |                         |
| L Posterior midcingulate cortex | 0.012             | -6                   | -20 | 44  |                         |
| L Precentral gyrus              | 0.016             | -26                  | -12 | 56  |                         |
| R Paracentral lobule            | 0.016             | 6                    | -32 | 58  |                         |
| L/R Posterior cingulate cortex  | 0.018             | 0                    | -40 | 30  |                         |
| R Precuneus                     | 0.018             | 6                    | -58 | 50  |                         |
| L Precuneus                     | 0.020             | -4                   | -60 | 38  |                         |
| R Postcentral gyrus             | 0.020             | 24                   | -30 | 66  |                         |
| R Precentral gyrus              | 0.021             | 20                   | -28 | 64  |                         |
| R Supramarginal gyrus           | 0.021             | 36                   | -50 | 38  |                         |
| L Internal capsule              | 0.021             | -16                  | 12  | 2   |                         |
| L Pre-supplementary motor area  | 0.027             | -8                   | 2   | 48  |                         |
| R Angular gyrus                 | 0.029             | 30                   | -70 | 28  |                         |
| Ventral tegmental area          | 0.033             | 0                    | -18 | -8  |                         |

|                                |       |     |     |    |     |
|--------------------------------|-------|-----|-----|----|-----|
| R Pre-supplementary motor area | 0.035 | 6   | 12  | 48 |     |
| L Anterior midcingulate cortex | 0.035 | -4  | 14  | 28 |     |
| Corpus callosum                | 0.035 | -4  | 22  | 14 |     |
| L Supramarginal gyrus          | 0.049 | -36 | -42 | 40 |     |
|                                |       |     |     |    |     |
| R Posterior Insula             | 0.018 | 36  | -20 | 6  | 747 |
| S2                             | 0.027 | 36  | -28 | 18 |     |



**SUPPLEMENTAL TABLE 3.** Regions of voxelwise increases in [<sup>11</sup>C]PBR28 SUVR<sub>occip</sub> in ALS patients compared to controls.

| Region                                         | <i>P</i> -value<br>(corr) | MNI coordinates (mm) |     |     | Cluster size (# voxels) |
|------------------------------------------------|---------------------------|----------------------|-----|-----|-------------------------|
|                                                |                           | X                    | Y   | Z   |                         |
| L Precentral gyrus                             | 0.000                     | -12                  | -20 | 62  | 21809                   |
| L Superior frontal gyrus                       | 0.002                     | -16                  | -6  | 58  |                         |
| L Paracentral lobule                           | 0.003                     | -2                   | -12 | 52  |                         |
| L Postcentral gyrus                            | 0.003                     | -26                  | -30 | 52  |                         |
| L Supplementary motor area                     | 0.003                     | -4                   | 2   | 54  |                         |
| R Precentral gyrus                             | 0.004                     | 24                   | -14 | 60  |                         |
| R Paracentral lobule                           | 0.004                     | 4                    | -20 | 64  |                         |
| R Supplementary motor area                     | 0.004                     | 10                   | 2   | 60  |                         |
| R Superior frontal gyrus                       | 0.004                     | 22                   | 8   | 46  |                         |
| L Corticospinal tract                          | 0.004                     | -24                  | -24 | 42  |                         |
| L Middle frontal gyrus                         | 0.007                     | -26                  | 14  | 46  |                         |
| L Ventrolateral prefrontal cortex              | 0.007                     | -24                  | 56  | -2  |                         |
| L Orbital gyrus                                | 0.008                     | -30                  | 26  | -20 |                         |
| L Dorsolateral prefrontal cortex               | 0.008                     | -34                  | 40  | 26  |                         |
| L Anterior midcingulate cortex/corpus callosum | 0.008                     | -6                   | 24  | 18  |                         |
| L Frontoinsular cortex                         | 0.010                     | -34                  | 24  | 0   |                         |
| R Anterior midcingulate cortex                 | 0.013                     | 6                    | 14  | 32  |                         |
| L Ventromedial prefrontal cortex               | 0.014                     | -4                   | 42  | -12 |                         |
| Dorsomedial prefrontal cortex                  | 0.016                     | 0                    | 60  | 18  |                         |

|                                          |       |    |    |     |    |
|------------------------------------------|-------|----|----|-----|----|
| R Pregenual anterior cingulate<br>cortex | 0.019 | 12 | 44 | -2  |    |
|                                          |       |    |    |     |    |
| R Orbital gyrus                          | 0.047 | 14 | 26 | -22 | 28 |

**SUPPLEMENTAL TABLE 4.** Interregional correlations between target and reference SUV and  $V_T$ .

| <b>Correlation between target and reference region SUV and <math>V_T</math></b> |                  |                 |                      |                 |                      |
|---------------------------------------------------------------------------------|------------------|-----------------|----------------------|-----------------|----------------------|
| <b>Target and reference SUV</b>                                                 |                  |                 |                      |                 |                      |
| Target region                                                                   | Reference region | <b>Control</b>  |                      | <b>Patient</b>  |                      |
|                                                                                 |                  | <i>r</i> -value | <i>p</i> -value      | <i>r</i> -value | <i>p</i> -value      |
| Thalamus<br>(CLBP dataset)                                                      | Occipital cortex | 0.956           | $1.6 \times 10^{-5}$ | 0.988           | $< 1 \times 10^{-6}$ |
|                                                                                 | Whole brain      | 0.922           | $1.4 \times 10^{-4}$ | 0.961           | $1 \times 10^{-5}$   |
|                                                                                 | Cerebellum       | 0.881           | $7.5 \times 10^{-4}$ | 0.948           | $3 \times 10^{-5}$   |
| Precentral gyrus<br>(ALS dataset)                                               | Occipital cortex | 0.941           | $4.8 \times 10^{-4}$ | 0.931           | $9.3 \times 10^{-5}$ |
|                                                                                 | Whole brain      | 0.962           | $9.0 \times 10^{-6}$ | 0.950           | $2.6 \times 10^{-5}$ |
|                                                                                 | Cerebellum       | 0.829           | $3.0 \times 10^{-3}$ | 0.873           | $9.7 \times 10^{-4}$ |
| <b>Target and reference <math>V_T</math></b>                                    |                  |                 |                      |                 |                      |
| Target region                                                                   | Reference region | <b>Control</b>  |                      | <b>Patient</b>  |                      |
|                                                                                 |                  | <i>r</i> -value | <i>p</i> -value      | <i>r</i> -value | <i>p</i> -value      |
| Thalamus<br>(CLBP dataset)                                                      | Occipital cortex | 0.947           | $4.1 \times 10^{-3}$ | 0.956           | $2.0 \times 10^{-4}$ |
|                                                                                 | Whole brain      | 0.992           | $1.1 \times 10^{-4}$ | 0.962           | $1.4 \times 10^{-4}$ |
|                                                                                 | Cerebellum       | 0.949           | $3.8 \times 10^{-3}$ | 0.904           | $2.0 \times 10^{-3}$ |
| Precentral gyrus<br>(ALS dataset)                                               | Occipital cortex | 0.974           | $1.0 \times 10^{-3}$ | 0.949           | $3.2 \times 10^{-4}$ |
|                                                                                 | Whole brain      | 0.996           | $2.6 \times 10^{-5}$ | 0.952           | $2.7 \times 10^{-4}$ |
|                                                                                 | Cerebellum       | 0.925           | $8.2 \times 10^{-3}$ | 0.975           | $3.6 \times 10^{-5}$ |
